# Supplementary material for: β-Catenin–dependent lysosomal targeting of internalized tumor necrosis factor-α suppresses caspase-8 activation in apoptosis-resistant colon cancer cells
Source: PubMed Central journal article supplement — Mol Biol Cell. 2013 Feb 15;24(4):465–73. doi: 10.1091/mbc.E12-09-0662 (PMC3571869; doi:10.1091/mbc.e12-09-0662), 2013-02-15
Supplement: supp_E12-09-0662v1_CombinedSupMats.pdf [file supp_E12-09-0662v1_CombinedSupMats.pdf]

***E12-09-0662-Revised***

**Supplemental Materials**

**$\beta$ -Catenin-Dependent Lysosomal Targeting of Internalized Tumor Necrosis  
Factor- $\alpha$  Suppresses Caspase-8 Activation in Apoptosis-Resistant Colon  
Cancer Cells**

Jinbo Han, Priya Sridevi, Michael Ramirez, Kirsten J. Ludwig, and Jean Y. J.  
Wang

**Content:**

**Materials & Methods –**

**Antibodies and Chemicals**

**Immunoblotting**

**Immunofluorescence**

**Supplemental Figure 1**

**Supplemental Figure 2**

**Supplemental Figure 3**

**Supplemental Figure 4**

**Supplemental Figure 5**

### **Antibodies and Chemicals**

Mouse anti- $\beta$ -catenin (610153), mouse anti-FADD (556402), mouse anti-RIPK1 (610458) and mouse anti-total EGFR (610016) were from BD Biosciences. Mouse anti-caspase-8 (#9746), rabbit anti-cleaved caspase-3 (#9664), rabbit anti-cleaved caspase-8 (#9496), rabbit anti-PARP1 (#9542), rabbit anti-FLIP (#3210), rabbit anti-clAP (#4952), rabbit anti-XIAP (#2042) and rabbit anti-phospho-EGFR Tyr1173 (#4407) were from Cell Signaling Technology. Rabbit anti-TNFR1 (ab19139) was from Abcam. Mouse anti-GAPDH (MAB374) was from Millipore. Rabbit anti-TRADD (sc-7868) and rabbit anti-IKB- $\alpha$  (SC-371) were from Santa Cruz Biotechnology. Horseradish peroxidase (HRP)-conjugated secondary antibodies were purchased from Cell Signaling Technology. The TUNEL staining kit was obtained from BD Biosciences; recombinant human and mouse TNF were from Peprotech; BafilomycinA1 and concanamycin A were from Sigma-Aldrich. E64D and Pepstatin were from Enzo Life Sciences. LysoTracker-red DND-99 was from Invitrogen.

### **Immunoblotting**

Proteins from cell lines were extracted in RIPA buffer (25 mM Tris-HCl pH 7.4, 1 mM EDTA, 0.1% SDS, 150 mM NaCl, 1% NP-40, 1 % Sodium Deoxycholate, 1 mM phenylmethylsulfonyl fluoride, and protease inhibitor cocktail) and measured by Lowry protein assay. Equal amounts of total proteins were loaded on SDS-PAGE, transferred onto a nitrocellulose membrane, and probed with primary antibodies overnight at 4°C. HRP conjugated secondary antibodies were

incubated for 1 hour at room temperature, and HRP signal were detected by chemiluminescence (Thermo).

### **Immunofluorescence**

Cells were fixed with 4% paraformaldehyde, permeabilized with 0.3% Triton x-100 and blocked with 5% bovine serum albumin. Incubated with primary antibodies for 2 hr at 37 °C. Cells were then incubated with anti-mouse ALEXA fluor-594 and anti-rabbit ALEXA fluor-488 (Invitrogen) for 1 hour at 37 °C. DNA was stained with DAPI. Fluorescence images were captured by Zeiss LSM Confocal microscopy.

### **Down-regulation of EGF receptor (EGFR) in HCT116 and LIM1899 cells**

HCT-116 and LIM 1899 cells were seeded and 24 hours later pre-treated with 200nM bafilomycin and/or 50µM sodium ortho-vanadate for 2 hours. Cells were then treated with 100nM EGF at 4° for one hour, and then warmed to 37° to induce endocytosis. At the indicated time points after temperature shift, cells were collected and lysed in RIPA buffer (25 mM Tris-HCl pH 7.4, 1 mM EDTA, 0.1% SDS, 150 mM NaCl, 1% NP-40, 1% Sodium Deoxycholate, 1 mM phenylmethylsulfonyl fluoride, and protease inhibitor cocktail). Equal amounts (30 µg) of total proteins were loaded on SDS-PAGE, transferred onto a nitrocellulose membrane, and probed with primary antibodies overnight at 4°. HRP conjugated secondary antibodies were incubated for 1 hour at room temperature. Proteins

Supplemental Materials E12-09-0662

were visualized by chemiluminescence as recommended by the manufacturer (Thermo).

## Supplemental Figure 1

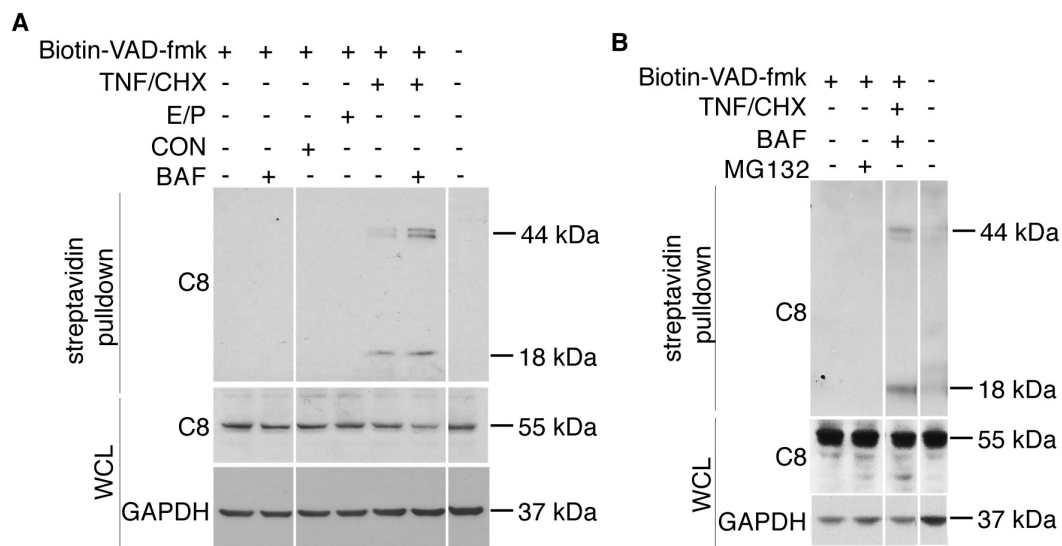

**Supplemental Figure 1. V-ATPase, lysosomal and proteasomal inhibitors do not activate caspase-8.**

A. *In vivo* affinity labeling of activated caspase-8 in LIM1899 cells, treated with bafilomycin (BAF: 200 nM), concanamycin (CON: 100 nM), E64D/Pepstatin (E/P: 10  $\mu$ g/ml each), TNF- $\alpha$  (TNF: 10 ng/mL) and cycloheximide (CHX: 2.5  $\mu$ g/ml). Cells were harvested after incubation with the drugs for 6 hr, lysed and whole cells lysates were incubated with streptavidin beads and caspase-8 was detected in the bound fractions by immunoblotting. Samples were run on the same gel, but were non-contiguous.

B. *In vivo* affinity labeling of activated caspase-8 in LIM1899 cells, treated with the indicated drugs as in B. MG132: 10  $\mu$ M. Samples were run on the same gel but were non-contiguous.

Supplemental Figure 2

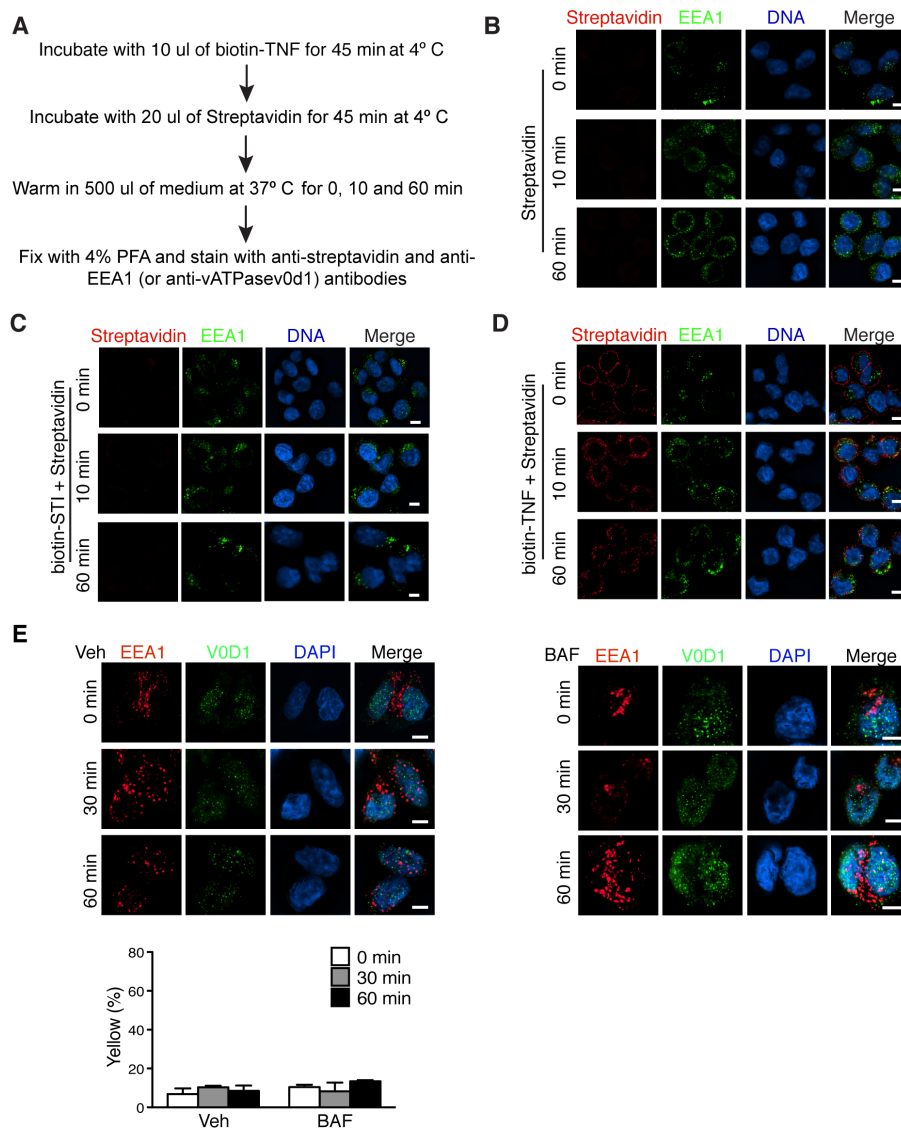

### Supplemental Figure 2. Subcellular localization of internalized TNF.

(A) Flow chart of experimental strategy to synchronize the internalization of streptavidin-biotin-TNF. (B-D) LIM1899 cells on coverslips were incubated with streptavidin alone (B), biotin-soy bean trypsin inhibitor (biotin-STI) (C), or biotin-TNF (2.5  $\mu$ g/mL) plus CHX (2.5  $\mu$ g/ml) (D) at 4° for 45 min, followed by another 45 min incubation with streptavidin (5 ng/mL) at 4°, and then warmed to 37°. Cells were fixed at indicated time points and stained with anti-streptavidin (red) and anti-EEA1 (green). (E) LIM1899 cells were labeled and fixed as in A and stained with anti-EEA1 (red) and anti-v0d1 of V-ATPase (V0D1) (green). Histogram shows co-localization of EEA1 and V0D1 determined with the software Colocalizer Pro.

### Supplemental Figure 3

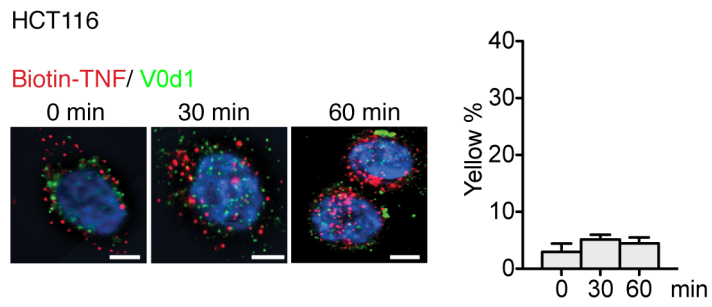

**Supplemental Figure 3. Internalized biotin-TNF did not co-localize with V0D1 in HCT116 cells.** Co-localization of biotin-TNF with V0D1 in HCT116 cells was determined as in Figs2, Fig. 3B and see Methods. Scale bar: 10  $\mu$ m.

Supplemental Figure 4

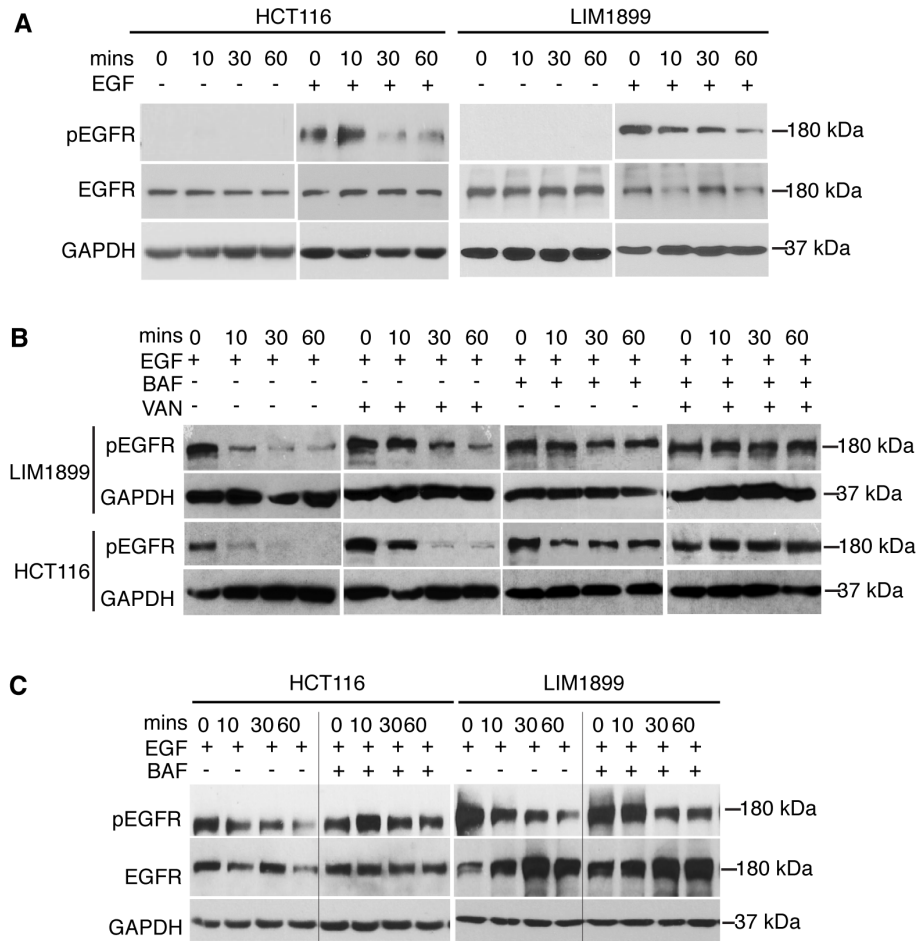

**Supplemental Figure 4. EGF receptor down-regulation and its rescue by Bafilomycin A are similar in HCT116 and LIM1899 cell lines.**

(A) The indicated cell lines were treated with or without EGF (100 ng/ml) at 4° for 1 hr. Cells were harvested at the indicated time points after warming at 37°. Western blots show EGFR and phosphorylated EGFR (pEGFR) level. GAPDH was used as loading control.

(B) & (C) The indicated cell lines were pretreated with BAF and or VAN for 2 hr at 37° (BAF - Bafilomycin A: 200 nM; VAN - sodium orthovanadate: 50 μM), followed by incubation with EGF for 1 hr at 4°. Cells were harvested at the indicated time points after warming at 37°. Western blots show EGFR and pEGFR level. GAPDH was used as loading control.



Supplemental Figure 5

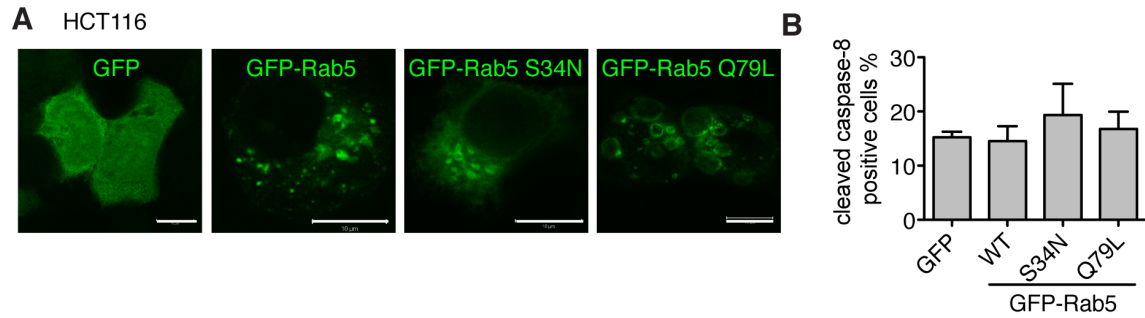

**Supplemental Figure 5. Ectopic expression of GFP-Rab5, dominant-negative GFP-Rab5 S34N or dominant-active GFP-Rab5-Q79L did not affect TNF/CHX induced caspase-8 cleavage in HCT116 cells**

(A) Localization of GFP tagged WT, dominant-negative Rab5 (S34N) or dominant activate Rab5 (Q79L) in HCT116 cells. Scale bar: 10  $\mu$ m.

(B) TNF/CHX-induced caspase-8 cleavage in HCT116 cells transiently transfected with the indicated constructs were fixed and stained with anti- $\Delta$ C8 antibody. TNF/CHX treatment began at 48 hr post-transfection and cells were treated for 4 hours. Values shown are mean and standard deviation from 5 fields with at least 1000 cells counted for each sample.
